# Supplementary material for: Amphiphilic miktoarm star copolymer (PCL)3-(PDEAEMA-b-PPEGMA)3 as pH-sensitive micelles in the delivery of anticancer drug
Source: Royal Society of Chemistry journal article supplement (doi:10.1039/c3tb21694b), 2014-01-01
Supplement: c3tb21694b1.pdf [file c3tb21694b1.pdf]

---

## Supplementary Data for

### Amphiphilic miktoarm star copolymer (PCL)<sub>3</sub>-(PDEAEMA-*b*-PPEGMA)<sub>3</sub> as pH-sensitive micelles in the delivery of anticancer drug

Wenjing Lin,<sup>a</sup> Shuyu Nie,<sup>a</sup> Qi Zhong,<sup>b</sup> Youqiang Yang,<sup>a</sup> Chengzhi Cai,<sup>c</sup> Jufang Wang,<sup>b,\*</sup> Lijuan Zhang<sup>a,\*</sup>

<sup>a</sup> School of Chemistry and Chemical Engineering, South China University of Technology, Guangzhou 510640, P R China

<sup>b</sup> School of Bioscience & Bioengineering, South China University of Technology, Guangzhou 510640, P R China

<sup>c</sup> Department of Chemistry, University of Houston, Houston, TX 77204, USA

#### Corresponding Author:

Li Juan Zhang, E-mail: [celjzh@scut.edu.cn](mailto:celjzh@scut.edu.cn). Telephone/Fax: +86-20-87112046.

Ju Fang Wang, E-mail: [jufwang@scut.edu.cn](mailto:jufwang@scut.edu.cn). Telephone/Fax: +86-20-39380626.

Table S1 GPC and <sup>1</sup>H NMR data of (PCL)<sub>3</sub>-Br<sub>3</sub> polymers

| Polymer <sup>a</sup>                               | $M_{n, TH}$ <sup>b</sup> | $M_{n, GPC}$ <sup>c</sup> | $M_w/M_n$ <sup>c</sup> | $M_{n, NMR}$ <sup>d</sup> |
|----------------------------------------------------|--------------------------|---------------------------|------------------------|---------------------------|
| (PCL <sub>16</sub> ) <sub>3</sub> -Br <sub>3</sub> | 6000                     | 6090                      | 1.28                   | 6173                      |
| (PCL <sub>25</sub> ) <sub>3</sub> -Br <sub>3</sub> | 10500                    | 9459                      | 1.45                   | 9251                      |
| (PCL <sub>33</sub> ) <sub>3</sub> -Br <sub>3</sub> | 12000                    | 10376                     | 1.59                   | 11987                     |

<sup>a</sup> The subscripts of PCL were the polymerization degree of PCL (*x*) calculated from <sup>1</sup>H NMR spectra.

<sup>b</sup> Calculated by feed ratio of monomer to initiator.

<sup>c</sup> Measured by GPC in THF.

<sup>d</sup> Calculated by the equations  $M_{n, (PCL)_3-Br_3} = 114 \times x \times 3 + 701$ .

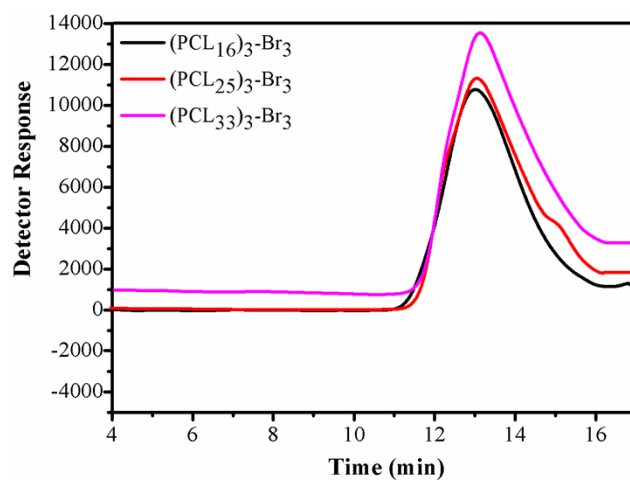

**Fig. S1** GPC traces of (PCL)<sub>3</sub>-Br<sub>3</sub> products.

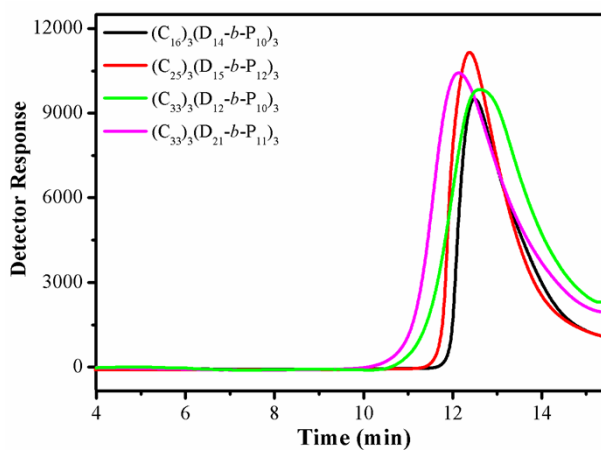

**Fig. S2** GPC traces of (PCL)<sub>3</sub>-(PDEAEMA-*b*-PPEGMA)<sub>3</sub> products.

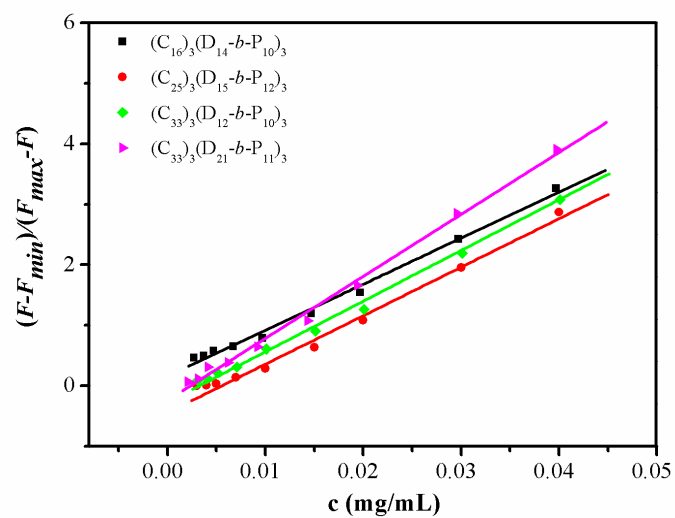

**Fig. S3** Plot of  $(F - F_{min}) / (F_{max} - F)$  vs concentration of  $(PCL)_3$ - $(PDEAEMA$ - $b$ - $PPEGMA)_3$  in aqueous solution.
